# Supplementary figures and images for: Unraveling Morphophysiological and Biochemical Responses of <em>Triticum aestivum </em>L. to Extreme pH: Coordinated Actions of Antioxidant Defense and Glyoxalase Systems
Source: Preprints.org preprint supplement (doi:10.20944/preprints201901.0143.v1), 2019-01-15

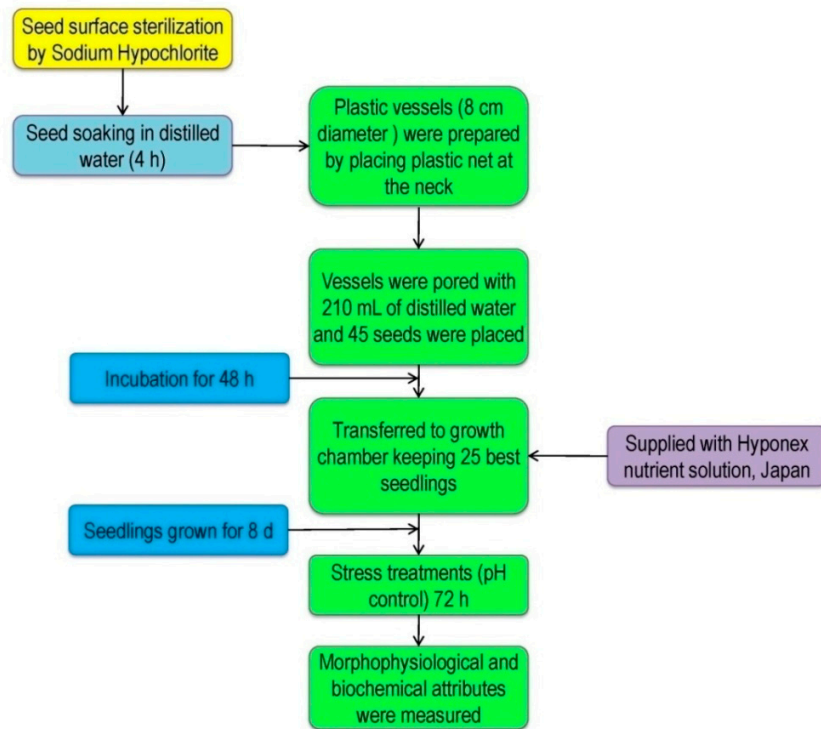

Figure S1: Work flow scheme of the conducted experiment

Supplement: Supplementary file 1 [file supplementary]
